# Supplementary material for: Identification of CT Imaging Phenotypes of Colorectal Liver Metastases from Radiomics Signatures—Towards Assessment of Interlesional Tumor Heterogeneity
Source: MDPI journal article supplement (doi:10.3390/cancers14071646), 2022-03-24
Supplement: s1 [file s1]

# Supplementary Materials: Identification of CT Imaging Phenotypes of Colorectal Liver Metastases from Radiomics Signatures—Towards Assessment of Interlesional Tumor Heterogeneity

Hishan Tharmaseelan, Alexander Hertel, Fabian Tollens, Johann Rink, Piotr Woźnicki, Verena Haselmann, Isabelle Ayx, Dominik Nörenberg, Stefan O. Schoenberg and Matthias F. Froelich

## Supplementary Material S1: List of R packages used.

| Package        | Version | Comment                  |
|----------------|---------|--------------------------|
| readxl         | 1.3.1   | import of data           |
| ComplexHeatmap | 2.6.2   | heatmap visualization    |
| pheatmap       | 1.0.12  | heatmap                  |
| circlize       | 0.4.13  | heatmap color schemes    |
| Boruta         | 7.0.0   | feature selection        |
| dplyr          | 1.0.7   | data manipulation/import |
| Caret          | 6.0-90  | find correlation         |
| glmnet         | 4.1-3   | Lasso Regression         |

### PCA graph of variables

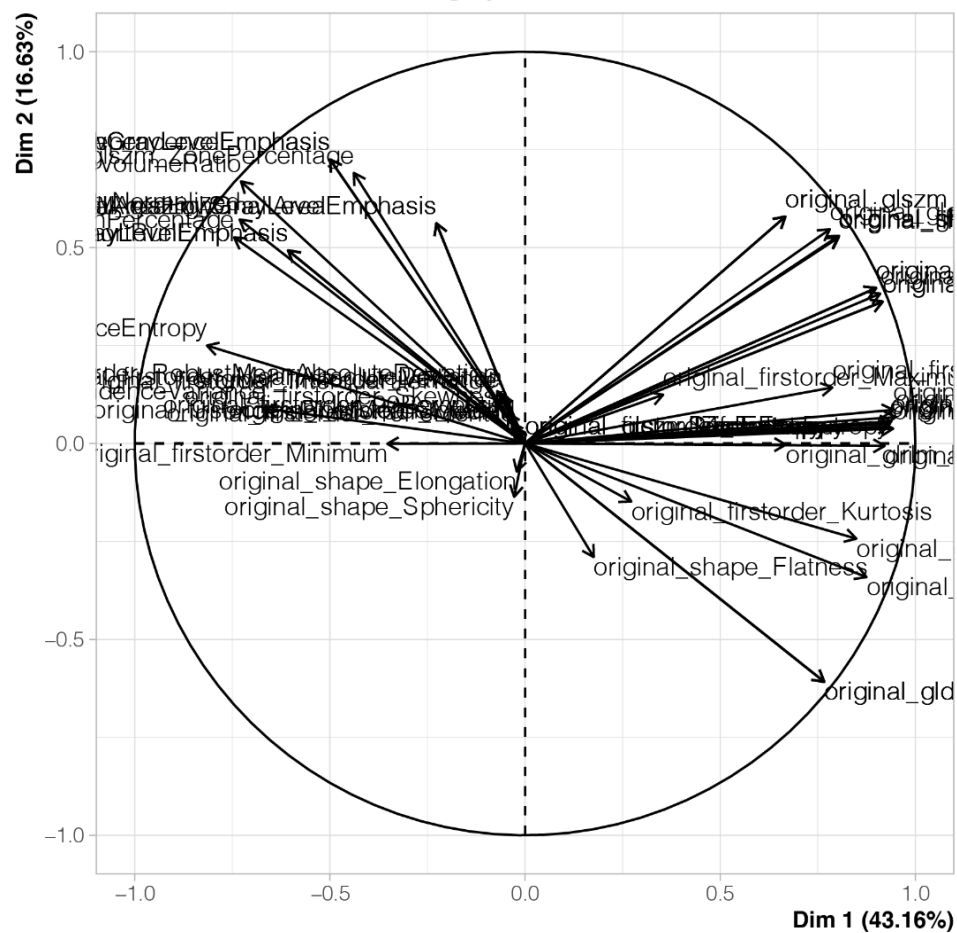

**Supplementary material S3: Pyradiomics Settings**

Extraction parameters:

```
{'minimumROIDimensions': 2, 'minimumROISize': None, 'normalize': False, 'normalizeScale': 1, 'removeOutliers': None, 'resampledPixelSpacing': None, 'interpolator': 'sitkBSpline', 'preCrop': False, 'padDistance': 5, 'distances': [1], 'force2D': False, 'force2Ddimension': 0, 'resegmentRange': None, 'label': 1, 'additionalInfo': True}
```

Enabled filters:

```
{'Original': {}}
```

Enabled features:

```
{'firstorder': [], 'glcm': [], 'gldm': [], 'glrlm': [], 'glszm': [], 'ngtdm': [], 'shape': []}
```

**Supplementary material S4: Results of LASSO regression**

|                                             |             |
|---------------------------------------------|-------------|
| (Intercept)                                 | 2.60153257  |
| original_shape_Elongation                   | .           |
| original_shape_Flatness                     | .           |
| original_shape_Sphericity                   | .           |
| original_firstorder_Kurtosis                | .           |
| original_firstorder_Range                   | 0.08451559  |
| original_firstorder_RootMeanSquared         | .           |
| original_firstorder_Skewness                | .           |
| original_firstorder_Variance                | .           |
| original_glcm_JointEntropy                  | .           |
| original_gldm_DependenceVariance            | -0.21175140 |
| original_glrlm_RunLengthNonUniformity       | 0.25892993  |
| original_glrlm_ShortRunLowGrayLevelEmphasis | -0.30726364 |
| original_glszm_LargeAreaEmphasis            | .           |
| original_glszm_SmallAreaEmphasis            | .           |
